# Supplementary material
Source: PubMed Central journal article supplement (PMC3220924)

Rel Quant

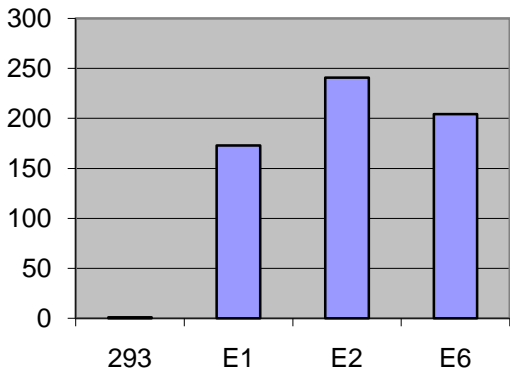

Supplement: NIHMS309877-supplement-3.pdf [file NIHMS309877-supplement-3.pdf]

Plasmid  
standards

$2 \times 10^{11}$   
 $2 \times 10^{10}$

293

293/E1

293/E2

293/E6

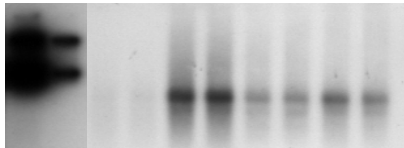

<MD

Supplement: NIHMS309877-supplement-4.pdf [file NIHMS309877-supplement-4.pdf]

Uninfected 293

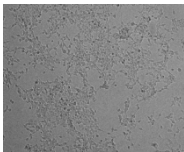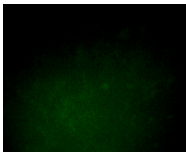

AAV/eGFP  
generated in :

293 cells

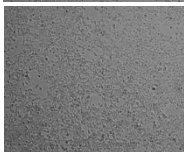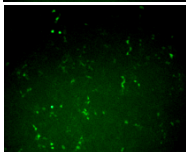

293/E1 cells

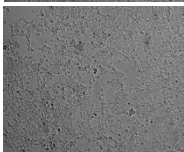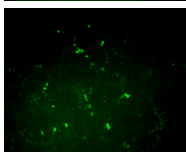

293/E2 cells

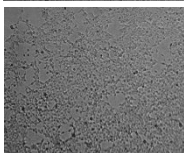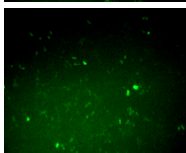

293/E6 cells

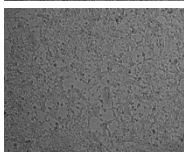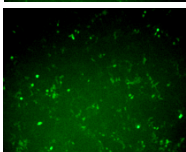

Supplement: NIHMS309877-supplement-5.pdf [file NIHMS309877-supplement-5.pdf]
